# Supplementary material for: Electroencephalographic slowing during REM sleep is a marker of cholinergic dysfunction in Lewy body disorders
Source: Research Square preprint supplement (doi:10.21203/rs.3.rs-8131680/v1), 2025-12-02
Supplement: Supplementary file 1 [file f04983120763e1ab32d18e3b.docx]

**Electroencephalographic slowing during REM sleep is a marker of cholinergic dysfunction in Lewy body disorders**

**Supplementary material**

#

# **Structural imaging preprocessing and volumetric analysis**

Anatomical data preprocessing was performed according to the standard CAT12 pipeline which included denoising using a spatially adaptive non-local means filter, bias field inhomogeneity correction, and segmentation of the brain into grey matter, white matter, and cerebrospinal fluid. Spatial normalization to standard MNI template (MNI152NLin2009cAsym) was performed using the Diffeomorphic Anatomic Registration Through Exponentiated Lie algebra (DARTEL) algorithm. Preprocessing and segmentation accuracy were confirmed through visual inspection, supported by automated quality control metrics. The weighted interquartile range, which incorporates factors such as noise, intensity inhomogeneity, and image resolution was above 80% for all participants, indicating acceptable quality of anatomical data.

Grey matter volumes for the amygdala and nucleus basalis of Meynert (NBM) were extracted in the subject’s native space using the *Estimate mean values in ROI function* in CAT12. Estimated volumes were calculated by integrating voxel-wise grey matter density values within atlas-based ROIs defined by maximum probability maps. For each voxel within an ROI, grey matter density was multiplied by the weighting contained within the probabilistic map and summed across the ROI. Non-linear inverse deformation matrices generated during spatial normalization were used to warp atlases from the standard template space to the individual subject’s native space to check registration.

**Functional imaging preprocessing and denoising**

The functional connectivity results included in this manuscript come from preprocessing performed using fMRIPrep 21.0.2 1,2; (RRID:SCR_016216), which is based on Nipype 1.8.1 3,4; (RRID:SCR_002502).

The T1-weighted (T1w) image was corrected for intensity non-uniformity (INU) using N4BiasFieldCorrection 5; distributed with ANTs 2.3.1, (RRID:SCR_004757) and used as the T1w reference. The T1w reference was skull-stripped using the antsBrainExtraction.sh workflow (ANTs), with OASIS30ANTs as the target template. Brain tissue segmentation (CSF, WM, GM) was performed using fast 6; FSL 6.0.3, (RRID:SCR_002823). Spatial normalization to MNI152NLin6Asym and MNI152NLin2009cAsym templates was conducted using antsRegistration (ANTs 2.3.1) on brain-extracted images. The following templates were used: FSL's MNI ICBM 152 non-linear 6th Generation Asymmetric Average Brain Stereotaxic Registration Model 7; (RRID:SCR_002823) and ICBM 152 Nonlinear Asymmetrical template version 2009c 8; (RRID:SCR_008796).

A reference volume and its skull-stripped version were generated using a custom fMRIPrep methodology. Head-motion parameters were estimated using mcflirt (FSL 6.0.3). Slice-time correction was applied using 3dTshift (AFNI 20170202). The preprocessed BOLD time series were resampled to native space, followed by co-registration to the T1w reference using mri_coreg (FreeSurfer) and flirt (FSL).

Confounding time-series (e.g., FD, DVARS, global signals) were calculated, and CompCor regressors were extracted 9. BOLD runs were normalized to MNI152NLin6Asym and MNI152NLin2009cAsym spaces via antsApplyTransforms (ANTs) and mri_vol2surf (FreeSurfer).

Many operations used Nilearn 0.9.1 10; (RRID:SCR_001362). For further details, please see fMRIPrep's documentation.

Following preprocessing, resting-state fMRI data were processed using Python and Nilearn to extract region-wise time-series data. Confounds, including motion parameters and WM/CSF signals, were regressed out using Nilearn’s load_confounds function, with motion and "basic" WM/CSF strategies. A custom parcellation atlas, provided as a NIfTI image, was used to define regions of interest (ROIs). The NiftiLabelsMasker from Nilearn was applied to the preprocessed BOLD images to extract average time-series data for each ROI. The masker included temporal filtering with a high-pass band filter (0.01 Hz) to remove low-frequency drifts and a low-pass band filter (0.1 Hz) to exclude high-frequency physiological noise. Data were extracted at a resolution of 2 mm in the MNI152NLin6Asym space. More information can be found at fMRIDenoise's documentation.

**Supplementary Table 1.** Group Differences in Neuropsychological Testing

| **Cognitive Measures** | **Controls (*n*=44)** | **PD (n=36)** | **DLB (*n*=24)** | ***p* value** |
| --- | --- | --- | --- | --- |
| MoCA | - | 27.9±1.8 | 17.2±6.6 | <0.001 |
| MMSE | 28.9±1.7 | 28.9±1.4 | 21.8±5.4 | <0.001b,c |
| Trail Making B | 0.7±0.5 | -0.3±1.7 | -1.0±0.8 | 0.002a,b |
| Logical Memory I | 11.1±3.4 | 10.7±3.2 | 4.8±3.3 | <0.001b,c |
| Logical Memory II | 12.2±3.0 | 11.6±2.8 | 5.9±3.3 | <0.001b,c |
| Logical Memory Recall | 12.5±2.9 | 12.0±2.4 | 7.6±4.6 | <0.001b,c |
| Digit Span Backwards | 7.2±2.4 | 7.1±2.0 | 4.3±2.1 | <0.001b,c |
| Digital Span Total | 11.5±2.8 | 12.3±2.8 | 8.7±3.0 | <0.001b,c |
| Verbal Fluency Letters | 0.5±0.9 | 0.4±1.3 | -1.1±1.0 | <0.001b,c |
| Verbal Fluency Animals | 1.0±1.0 | 0.6±1.2 | -1.5±0.9 | <0.001b,c |
| RAVLT A1-A5 | 10.5±3.1 | 10.8±2.6 | 3.7±3.3 | <0.001b,c |
| Stroop Inhibition | 11.9±2.3 | 11.0±3.0 | 4.3±4.3 | <0.001b,c |
| Stroop Inhibition/Switching | 12.1±2.2 | 11.2±3.7 | 5.0±3.7 | <0.001b,c |
| Clock Drawing | - | 9.8±0.6 | 7.4±2.8 | <0.001 |
| Boston Naming | - | 13.5±1.7 | 11.4±3.3 | 0.043 |

Neuropsychiatric data

Values are displayed as mean±standard deviation.

P values were calculated using non-parametric permutation testing. DLB, Dementia with Lewy Bodies; PD, Parkinson’s Disease; MMSE, The Mini Mental State Examination; MoCA, Montreal Cognitive Assessment; RAVLT, Rey Auditory Verbal Learning Test.

aPairwise comparisons: significant differences between PD and HC

bPairwise comparisons: significant differences between DLB and HC

cPairwise comparisons: significant differences between DLB and PD

**Supplementary Table 2.** Group Differences in REM EEG Power and Slowing Ratios in Frontal, Central and Occipital Regions

|  | **Controls (*n*=44)** | **PD (n=36)** | **DLB (*n*=24)** | **pFDR** |
| --- | --- | --- | --- | --- |
| **REM EEG Power** |  | | | |
| **Frontal** |  |  |  |  |
| Delta | 129.3±78.0 | 103.4±93.6 | 137.2±74.4 | 0.555 |
| Theta | 17.1±10.1 | 19.0±11.6 | 25.9±19.1 | 0.259 |
| Alpha | 10.0±5.1 | 11.3±6.2 | 10.5±8.5 | 0.682 |
| Sigma | 3.5±1.6 | 4.2±2.8 | 3.8±2.2 | 0.586 |
| Beta | 8.7±4.2 | 13.1±9.6 | 15.1±9.2 | 0.030a,b |
| **Central** |  |  |  |  |
| Delta | 91.2±48.5 | 73.0±38.6 | 96.1±50.0 | 0.259 |
| Theta | 17.0±10.5 | 18.4±14.9 | 20.7±9.2 | 0.641 |
| Alpha | 11.6±6.8 | 11.9±7.1 | 10.2±4.6 | 0.682 |
| Sigma | 4.1±2.1 | 4.5±3.0 | 3.6±1.8 | 0.586 |
| Beta | 8.6±3.8 | 11.0±6.3 | 11.4±7.4 | 0.259 |
| **Occipital** |  |  |  |  |
| *EEG Slowing Ratio* | *4.4±2.0* | *3.3±2.0* | *7.1±4.8* | *<0.001b,c* |
| Delta | 70.5±44.6 | 59.7±32.4 | 95.1±34.5 | 0.030b,c |
| Theta | 15.3±9.2 | 16.5±9.2 | 22.9±15.3 | 0.259 |
| Alpha | 11.0±6.6 | 12.1±7.5 | 9.4±8.1 | 0.611 |
| Sigma | 3.4±1.7 | 4.1±3.1 | 3.35±2.6 | 0.586 |
| Beta | 6.3±3.2 | 9.7±6.6 | 11.0±9.4 | 0.030a,b |
| **REM EEG Slowing Ratios** |  |  |  |  |
| Frontal | 7.0±3.4 | 4.9±2.9 | 6.8±4.1 | 0.057 |
| Central | 4.8±2.2 | 3.8±2.0 | 5.6±3.4 | 0.057 |
| Occipital | 4.4±2.0 | 3.3±2.0 | 7.1±4.8 | <0.001b,c |

Absolute REM EEG power spectra data (µV2) and REM EEG slowing ratios.

Values are displayed as mean±standard deviation.

P values were calculated using non-parametric permutation testing. DLB, Dementia with Lewy Bodies; PD, Parkinson’s Disease; REM, Rapid Eye Movement Sleep.

aPairwise comparisons: significant differences between PD and HC

bPairwise comparisons: significant differences between DLB and HC

cPairwise comparisons: significant differences between DLB and PD

**Supplementary Table 3.** Group Differences in NREM EEG Power and Slowing Ratios in Frontal, Central and Occipital Regions

|  | **Control (*n*=44)** | **PD (n=36)** | **DLB (*n*=24)** | **pFDR** |
| --- | --- | --- | --- | --- |
| **NREM EEG Power** |  | | | |
| **Frontal** |  |  |  |  |
| Delta | 304.4±140.9 | 254.9±110.5 | 229.9±124.5 | 0.088 |
| Theta | 30.6±20.1 | 31.1±17.8 | 31.3±27.2 | 0.994 |
| Alpha | 18.6±10.5 | 20.6±11.1 | 12.7±9.7 | 0.050 |
| Sigma | 5.3±2.7 | 6.3±3.8 | 4.0±2.3 | 0.050 |
| Beta | 6.9±3.8 | 10.0±6.1 | 14.0±9.8 | <0.001a,b,c |
| **Central** |  |  |  |  |
| Delta | 250.2±107.5 | 202.5±85.9 | 165.8±69.2 | 0.008a,b |
| Theta | 32.7±21.6 | 31.7±21.1 | 30.2±22.2 | 0.987 |
| Alpha | 19.4±10.5 | 19.7±11.3 | 11.8±7.6 | 0.019b,c |
| Sigma | 6.7±3.4 | 7.0±4.0 | 3.6±1.9 | 0.005b,c |
| Beta | 7.7±4.7 | 10.0±5.8 | 9.9±5.6 | 0.138 |
| **Occipital** |  |  |  |  |
| Delta | 188.1±118.0 | 161.6±78.9 | 127.8±70.2 | 0.050 |
| Theta | 30.3±17.1 | 30.3±15.8 | 26.6±26.0 | 0.986 |
| Alpha | 13.1±5.8 | 16.7±10.6 | 9.1±8.3 | 0.008a,c |
| Sigma | 4.6±1.9 | 5.8±3.4 | 3.4±3.0 | <0.001a,c |
| Beta | 6.2±2.9 | 10.8±9.2 | 11.9±15.4 | 0.008a,b |
| **NREM EEG Slowing Ratios** |  |  |  |  |
| Frontal | 11.6±4.2 | 8.9±4.2 | 9.7±4.7 | 0.090 |
| Central | 9.0±3.2 | 7.3±3.1 | 8.8±3.7 | 0.090 |
| Occipital | 9.3±3.9 | 6.6±3.1 | 7.9±3.0 | 0.015a |

Absolute NREM EEG power spectra data (µV2) and NREM EEG slowing ratios.

Values are displayed as mean±standard deviation.

P values were calculated using non-parametric permutation testing. DLB, Dementia with Lewy Bodies; PD, Parkinson’s Disease; NREM, Non-rapid Eye Movement Sleep.

aPairwise comparisons: significant differences between PD and HC

bPairwise comparisons: significant differences between DLB and HC

cPairwise comparisons: significant differences between DLB and PD

**Supplementary Table 4.** Group Differences in REM EEG Power and Slowing Ratios in Frontal, Central and Occipital Regions Controlling for Cholinesterase Inhibitors

|  | **Control (*n*=44)** | **PD (n=36)** | **DLB (*n*=24)** | **pFDR** |
| --- | --- | --- | --- | --- |
| **REM EEG Power** |  | | | |
| **Frontal** |  |  |  |  |
| Delta | 129.3±78.0 | 103.4±93.6 | 137.2±74.4 | 0.421 |
| Theta | 17.1±10.1 | 19.0±11.6 | 25.9±19.1 | 0.629 |
| Alpha | 10.0±5.1 | 11.3±6.2 | 10.5±8.5 | 0.566 |
| Sigma | 3.5±1.6 | 4.2±2.8 | 3.8±2.2 | 0.421 |
| Beta | 8.7±4.2 | 13.1±9.6 | 15.1±9.2 | 0.010a,b |
| **Central** |  |  |  |  |
| Delta | 91.2±48.5 | 73.0±38.6 | 96.1±50.0 | 0.465 |
| Theta | 17.0±10.5 | 18.4±14.9 | 20.7±9.2 | 0.618 |
| Alpha | 11.6±6.8 | 11.9±7.1 | 10.2±4.6 | 0.550 |
| Sigma | 4.1±2.1 | 4.5±3.0 | 3.6±1.8 | 0.550 |
| Beta | 8.6±3.8 | 11.0±6.3 | 11.4±7.4 | 0.465 |
| **Occipital** |  |  |  |  |
| Delta | 70.5±44.6 | 59.7±32.4 | 95.1±34.5 | 0.120 |
| Theta | 15.3±9.2 | 16.5±9.2 | 22.9±15.3 | 0.656 |
| Alpha | 11.0±6.6 | 12.1±7.5 | 9.4±8.1 | 0.606 |
| Sigma | 3.4±1.7 | 4.1±3.1 | 3.35±2.6 | 0.606 |
| Beta | 6.3±3.2 | 9.7±6.6 | 11.0±9.4 | 0.120 |
| **REM EEG Slowing Ratios** |  |  |  |  |
| Frontal | 7.0±3.4 | 4.9±2.9 | 6.8±4.1 | 0.061 |
| Central | 4.8±2.2 | 3.8±2.0 | 5.6±3.4 | 0.061 |
| Occipital | 4.4±2.0 | 3.3±2.0 | 7.1±4.8 | 0.003b,c |

Absolute REM EEG power spectra data (µV2) and REM EEG slowing ratios.

Values are displayed as mean±standard deviation.

P values were calculated using non-parametric permutation testing. DLB, Dementia with Lewy Bodies; PD, Parkinson’s Disease; REM, Rapid Eye Movement Sleep.

aPairwise comparisons: significant differences between PD and HC

bPairwise comparisons: significant differences between DLB and HC

cPairwise comparisons: significant differences between DLB and PD

**Supplementary Table 5.** Correlations between REM EEG slowing ratios and thalamic functional connectivity with resting-state networks

| **Frontal REM EEG Slowing** | **thal-VIS** | **thal-SMN** | **thal-DAN** | **thal-VAN** | **thal-LIM** | **thal-FPN** | **thal-DMN** |
| --- | --- | --- | --- | --- | --- | --- | --- |
| Beta | -11.784 | -9.282 | -14.234 | -9.619 | -4.141 | 1.055 | -0.354 |
| R squared | 0.071 | 0.048 | 0.134 | 0.044 | 0.021 | 0.012 | 0.012 |
| p value | 0.218 | 0.337 | 0.073 | 0.366 | 0.633 | 0.926 | 0.979 |
| **Central REM EEG Slowing** | **thal-VIS** | **thal-SMN** | **thal-DAN** | **thal-VAN** | **thal-LIM** | **thal-FPN** | **thal-DMN** |
| Beta | -5.357 | -4.991 | -8.170 | -4.357 | -2.232 | 2.994 | -0.167 |
| R squared | 0.042 | 0.038 | 0.096 | 0.031 | 0.025 | 0.025 | 0.019 |
| p value | 0.465 | 0.513 | 0.176 | 0.601 | 0.732 | 0.728 | 0.987 |
| **Occipital REM EEG Slowing** | **thal-VIS** | **thal-SMN** | **thal-DAN** | **thal-VAN** | **thal-LIM** | **thal-FPN** | **thal-DMN** |
| Beta | 13.549 | 8.756 | 2.304 | 14.448 | 9.984 | 11.369 | 13.287 |
| R squared | 0.243 | 0.162 | 0.121 | 0.236 | 0.196 | 0.170 | 0.168 |
| p value | 0.052 | 0.255 | 0.729 | 0.059 | 0.129 | 0.214 | 0.228 |

Linear regressions with age and sex as covariates. DAN, Dorsal attentional network; DMN, Default mode network; FC, Functional connectivity; FPN, Fronto-parietal network; LIM, Limbic network; PPN, Pedunculopontine Nucleus; thal, thalamus; SMN, Somatomotor network; VAN, Ventral attentional network; VIS, Visual network.
